# Supplementary material for: Efficient polyalcohol oxidation electrocatalysts enabled by PtM (M = Fe, Co, and Ni) nanocubes surrounded by (200) crystal facets
Source: Royal Society of Chemistry journal article supplement (doi:10.1039/d0nr00163e), 2020-01-01
Supplement: d0nr00163e1.pdf [file d0nr00163e1.pdf]

**Supporting Information for**  
**Efficient Polyalcohol Oxidation Electrocatalysts Enabled by PtM**  
**(M=Fe, Co, Ni) Nanocubes Surrounded by (200) Crystal Facet**

Tongxin Song, Fei Gao, Yangping Zhang, Chunyan Chen,

Cheng Wang, Shujin Li\*, Hongyuan Shang, Yukou Du\*

*College of Chemistry, Chemical Engineering and Materials Science,*

*Soochow University, 199 Ren'ai Road, Suzhou 215123, P.R. China*

*\*Corresponding author: E-mail: shujinli@suda.edu.cn (S. Li);*

*duyk@suda.edu.cn (Y. Du).*

## Experimental section

### Chemicals and Materials

Platinum (II) acetylacetonate ( $\text{Pt}(\text{acac})_2$ , reagent grade, 97%), Nickel (II) acetylacetonate ( $\text{Ni}(\text{acac})_2$ , 97%), Tungsten carbonyl ( $\text{W}(\text{CO})_6$ , reagent grade, 98%) Oleylamine (OAm, 80%) and 1-octadecylene (ODE, reagent grade, 90%) were purchased from Sigma-Aldrich. Cobalt acetylacetonate ( $\text{Co}(\text{acac})_3$ , 98%) was obtained from Aladdin Industrial Corporation. Iron acetylacetonate ( $\text{Fe}(\text{acac})_2$ , 97%) and citric acid (CA, Analytical Reagent,  $\geq 99.5\%$ ) were acquired from Shanghai Macklin Biochemical Co., Ltd. Commercial Pt/C catalyst (20 wt%) was obtained from Shanghai Hesun Electric Co., Ltd. The average particle size was 2.8 nm. All chemicals were used directly without further purification.

### Preparation of $\text{Pt}_4\text{M}$ (M=Fe, Co, Ni) NCs

In the synthesis of  $\text{Pt}_4\text{Ni}$  NCs,  $\text{Pt}(\text{acac})_2$  (10 mg),  $\text{Ni}(\text{acac})_2$  (3.3 mg),  $\text{W}(\text{CO})_6$  (5 mg) and CA (10 mg) were introduced into a glass vessel containing 3 mL of OAm, 2 mL of ODE and 0.1 mL of  $\text{H}_2\text{O}$ . After the mixture has undergone ultrasonic treatment for 1 h, the vessel was sealed and heated in oil bath at 160 °C and held for 5 h. Until cooling naturally, the product was centrifuged and washed with a mixture of cyclohexane and ethanol for three times. The  $\text{Pt}_4\text{Fe}$  NCs and  $\text{Pt}_4\text{Co}$  NCs were obtained by changing the 3.3 mg of  $\text{Ni}(\text{acac})_2$  into 3.3 mg of  $\text{Fe}(\text{acac})_2$  and 4.5 mg of  $\text{Co}(\text{acac})_3$ .

### Physical characterizations

The structure of product was observed on HITACHI HT7700 transmission electron microscope (TEM). The high-resolution TEM, STEM-EDS mapping, high-angle annular dark field scanning transmission electron microscopy (HAADF-STEM), and the EDS line-scanning profile were performed on FEI Tecnai F20 TEM. The composition of element was detected on EVO 18 scanning electron microscope with energy-dispersive X-ray spectroscopy (SEM-EDS). The crystal property was obtained on X'Pert-Pro MPD diffractometer (PANalytical, Netherlands) with a  $\text{Cu K}\alpha$  X-ray source ( $\lambda=1.540598 \text{ \AA}$ ). And the X-ray photoelectron spectroscopy (XPS) was conducted on Thermo Scientific ESCALAB 250 XI X-ray photoelectron spectrometer.

## **Electrooxidation measurements**

Before electrochemical tests, the collected Pt<sub>4</sub>M NCs were supported on Vulcan XC72R carbon black, which was labeled as Pt<sub>4</sub>M NCs/C, then were made into 0.4 mg<sub>Pt</sub>mL<sup>-1</sup> catalysts suspension (containing 5% of Nafion). All measurements were performed on three-electrode CHI 660e electrochemical workstation. The glassy carbon electrode (GCE, diameter: 5 mm) covered with 5 μL of catalysts ink was used as the working electrode, the Pt wire as counter electrode and the saturated calomel electrode (SCE) as reference electrode. We scanned the cyclic voltammetry (CV) curves at a scanning rate of 0.05 V s<sup>-1</sup> in 0.1 M HClO<sub>4</sub> solution with the potential range of -0.3~0.9 V. Then we conducted the GOR in 1 M KOH + 1 M glycerol mixed solution and the EGOR in 1 M KOH + 1 M EG solution with the range of -0.9~0.3 V. The chronoamperometry (CA) test was performed in the same mixed solution at -0.25 V for 3600 s. And the continuous CVs was carried out for 250 cycles. Furthermore, the electrochemical impedance spectroscopy (EIS) was tested to evaluate the electronic conductivity.

## Supplementary Figures and Tables

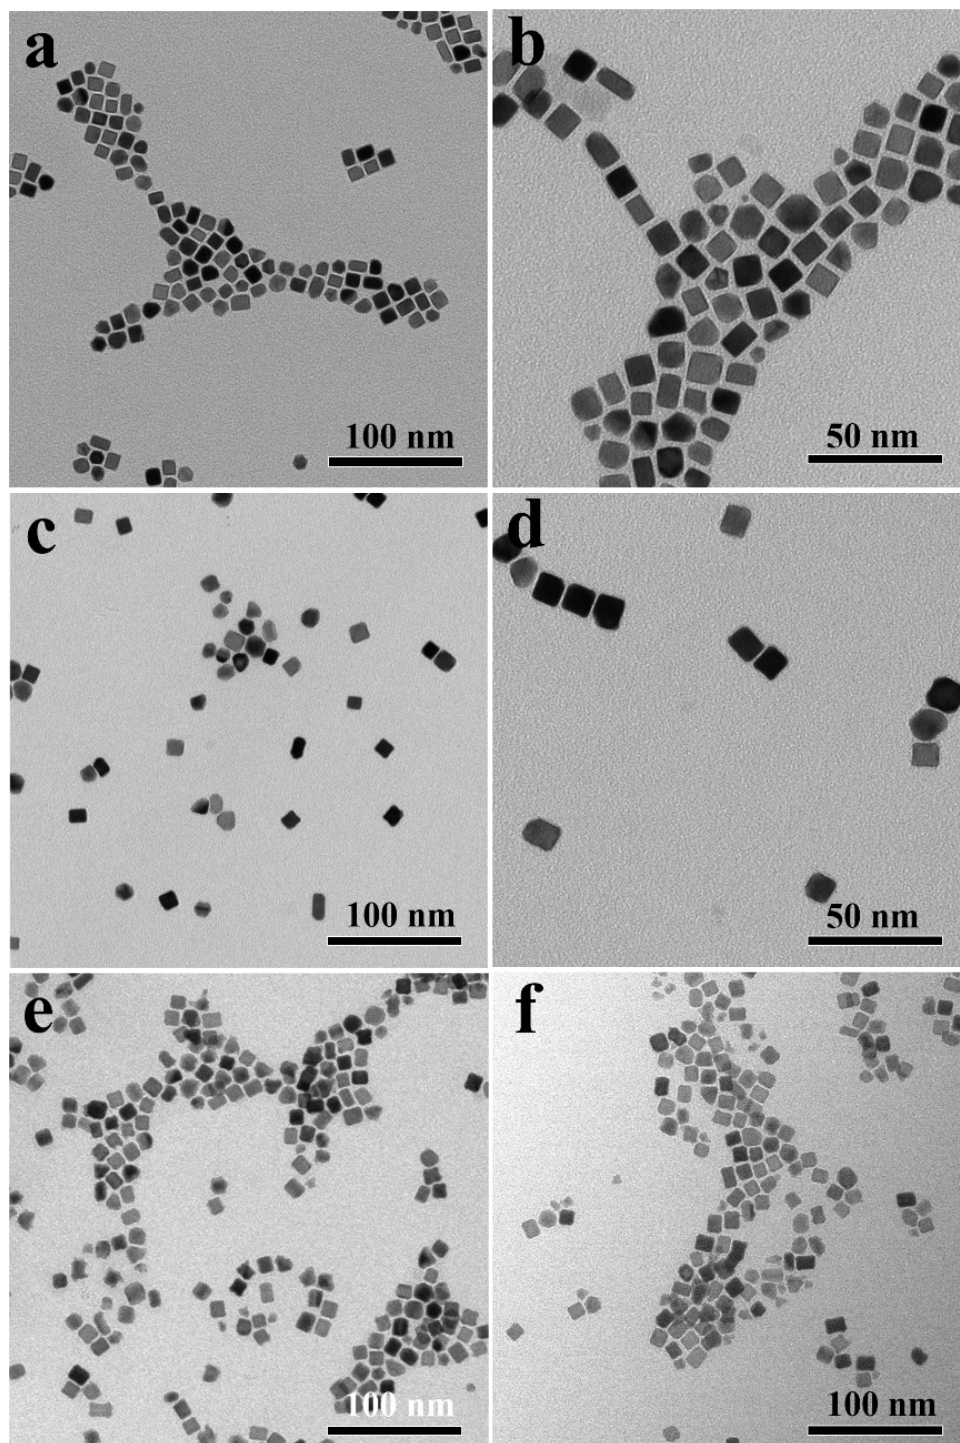

**Fig. S1** Representative TEM images of the products with the same reaction conditions as that of Pt<sub>4</sub>Ni NCs but changing the temperature: (a, b) 150 °C, (c, d) 170 °C, and (e, f) 180 °C.

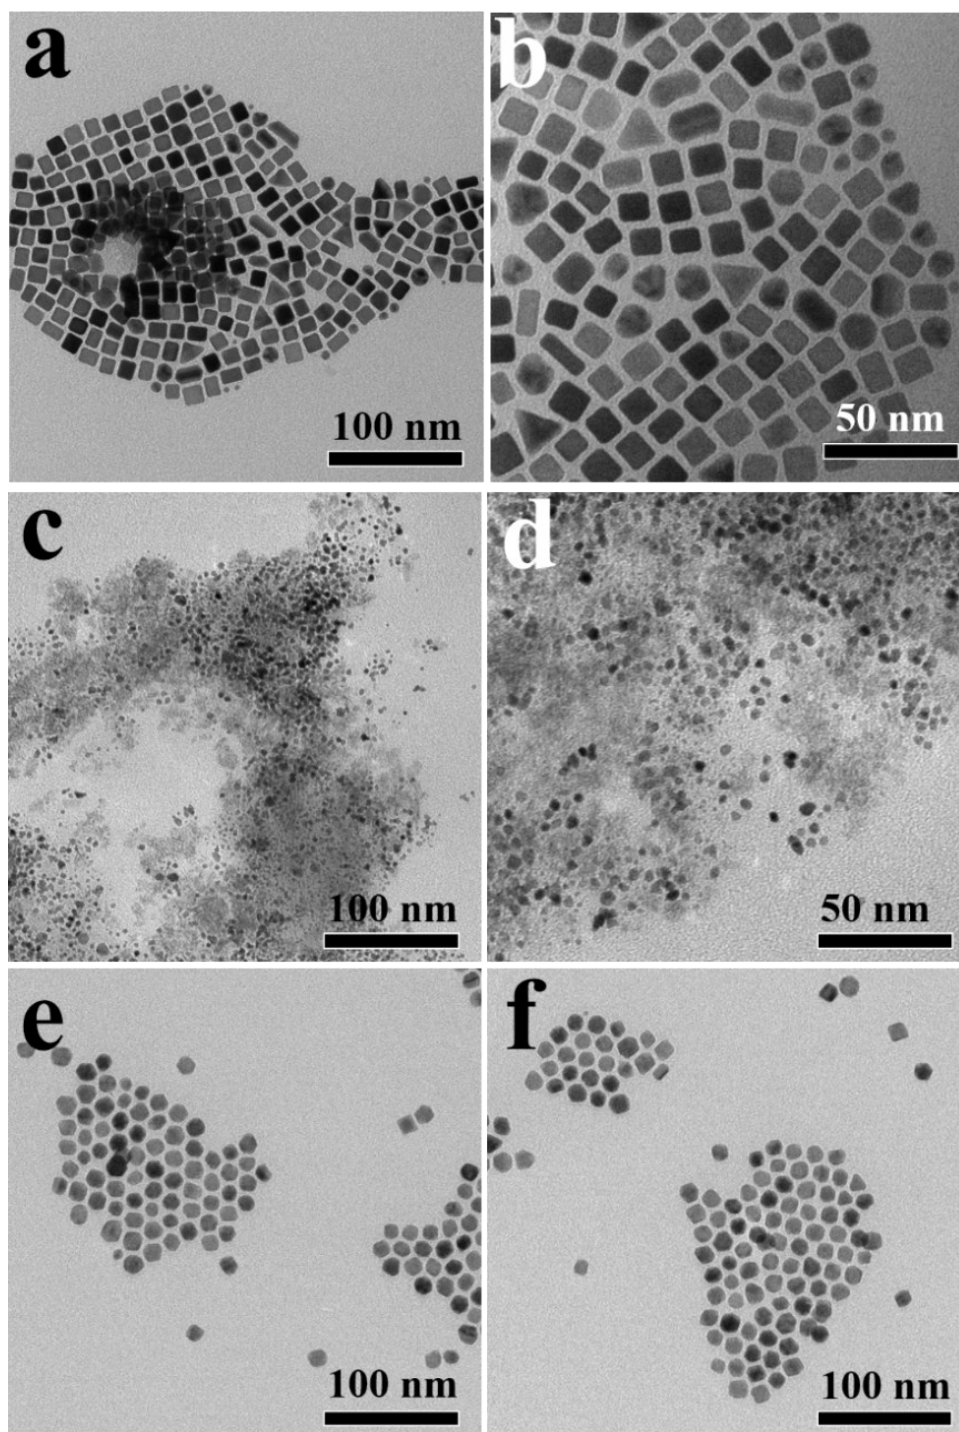

**Fig. S2** Representative TEM images of the products with the same reaction conditions as that of Pt<sub>4</sub>Ni NCs but changing the solvent: (a, b) 5 mL OAm, (c, d) 5 mL ODE, and (e, f) 4 mL OAm and 1 mL OA.

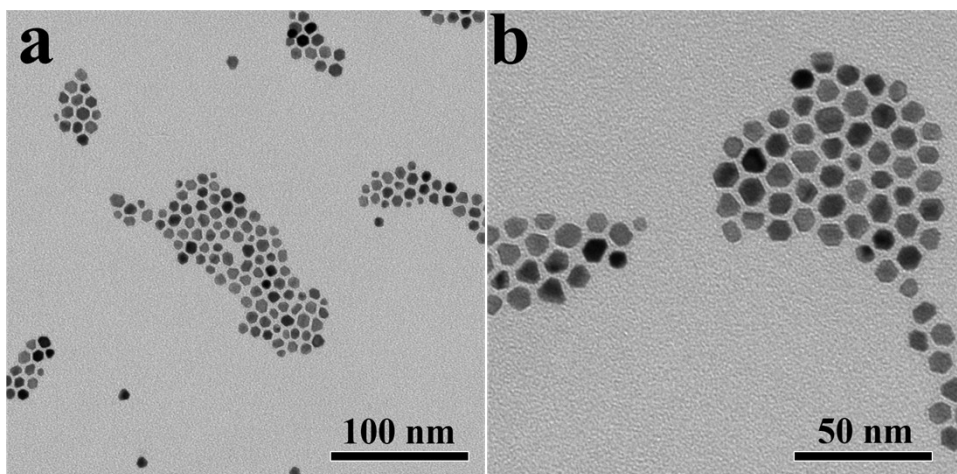

**Fig. S3** Representative TEM images of the products with the same reaction conditions as that of Pt<sub>4</sub>Ni NCs but without the water.

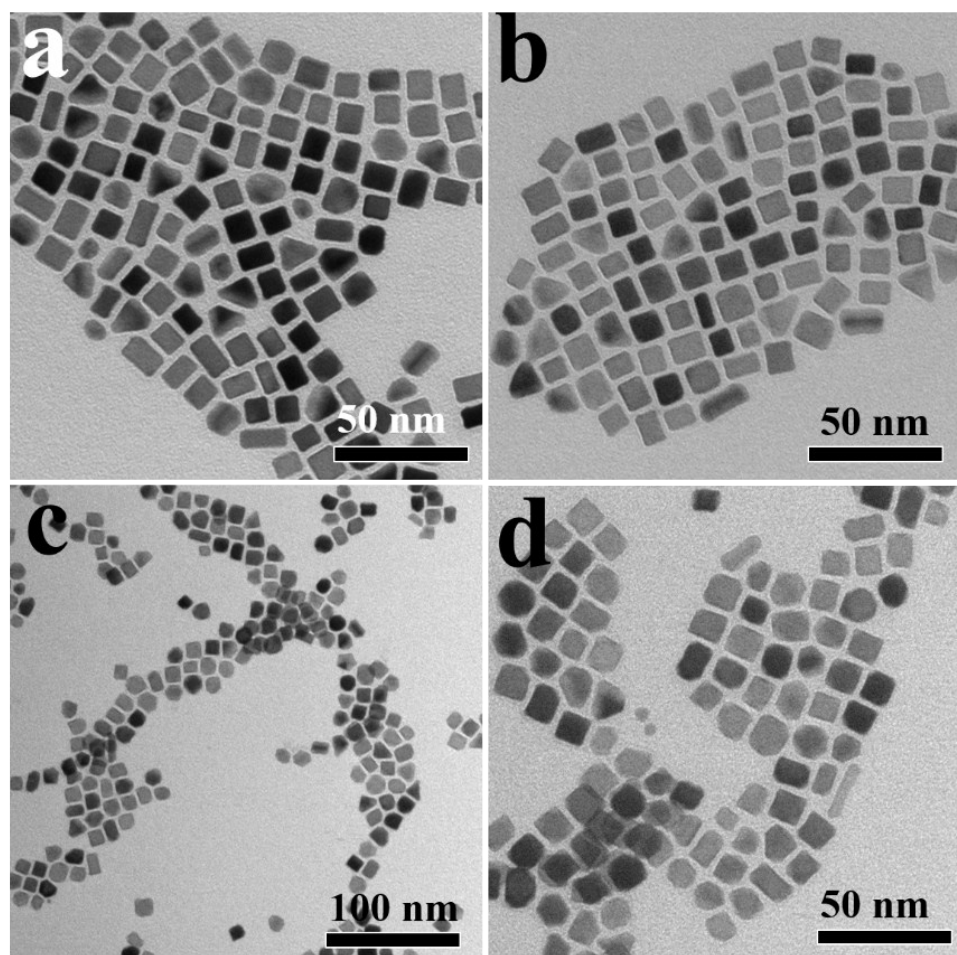

**Fig. S4** Representative TEM images of the products with the same reaction conditions as that of Pt<sub>4</sub>Ni NCs but changing the ratio of OAm to ODE: (a, b) 4 mL OAm and 1 mL ODE, and (c, d) 2 mL OAm and 3 mL ODE.

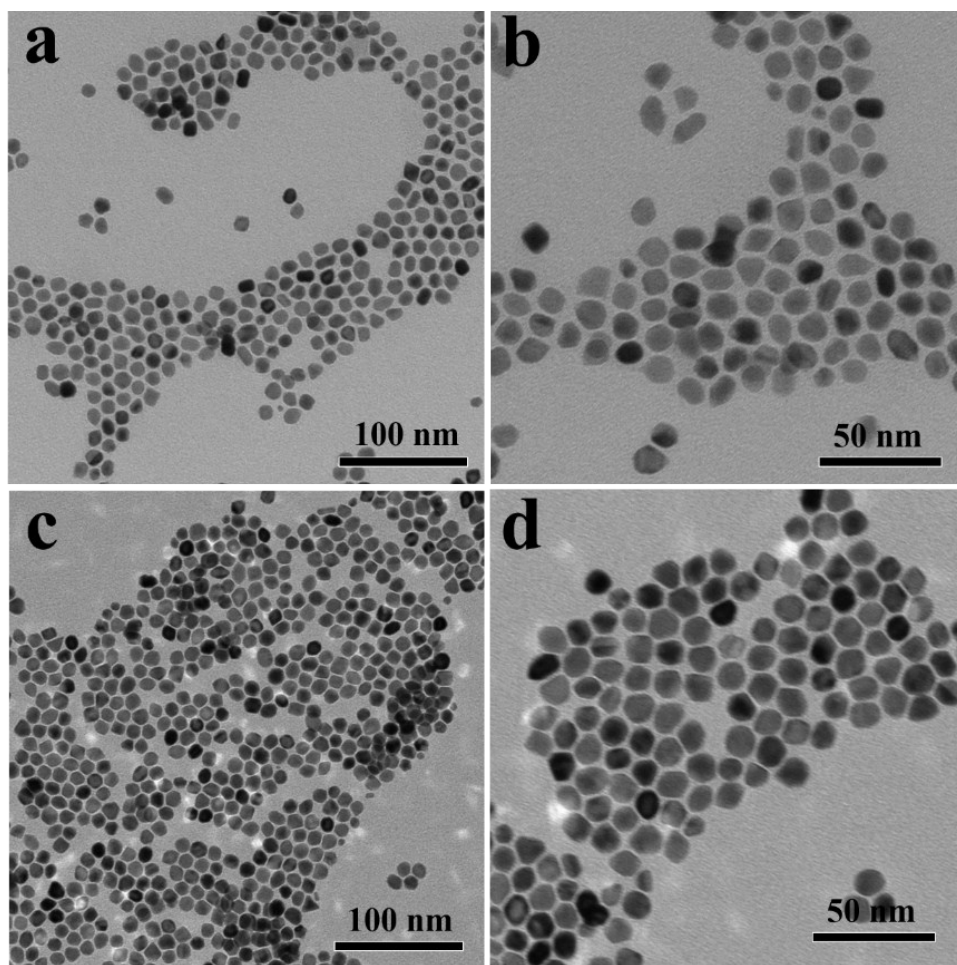

**Fig. S5** Representative TEM images of the products with the same reaction conditions as that of Pt<sub>4</sub>Ni NCs but varying amounts of W(CO)<sub>6</sub>: (a, b) 10 mg, and (c, d) 20 mg. In the absence of W(CO)<sub>6</sub>, the system has no products.

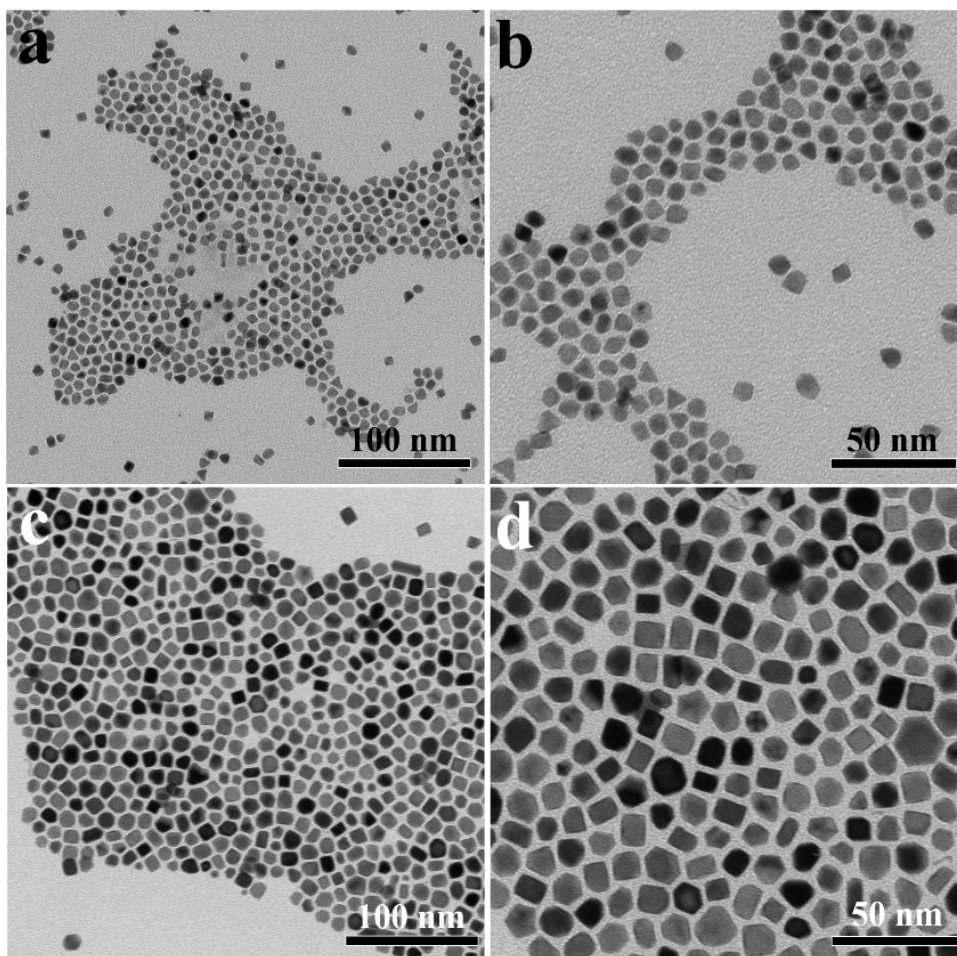

**Fig. S6** Representative TEM images of the products with the same reaction conditions as that of Pt<sub>4</sub>Ni NCs but varying amounts of CA: (a, b) 0 mg, and (c, d) 40 mg.

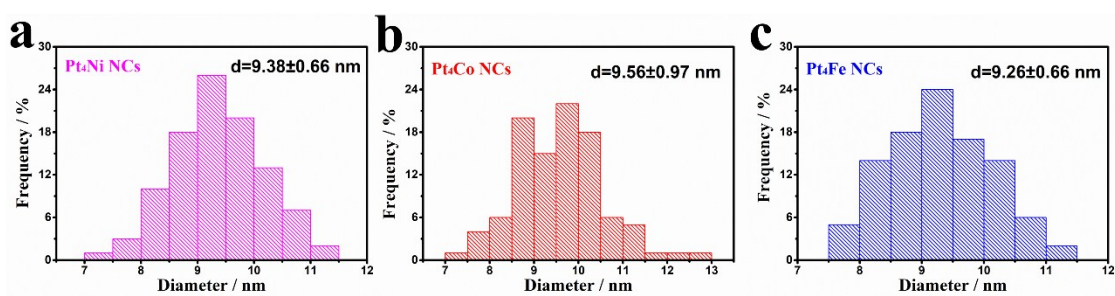

**Fig. S7** The size distribution of (a) Pt<sub>4</sub>Ni NCs, (b) Pt<sub>4</sub>Co NCs, and (c) Pt<sub>4</sub>Fe NCs.



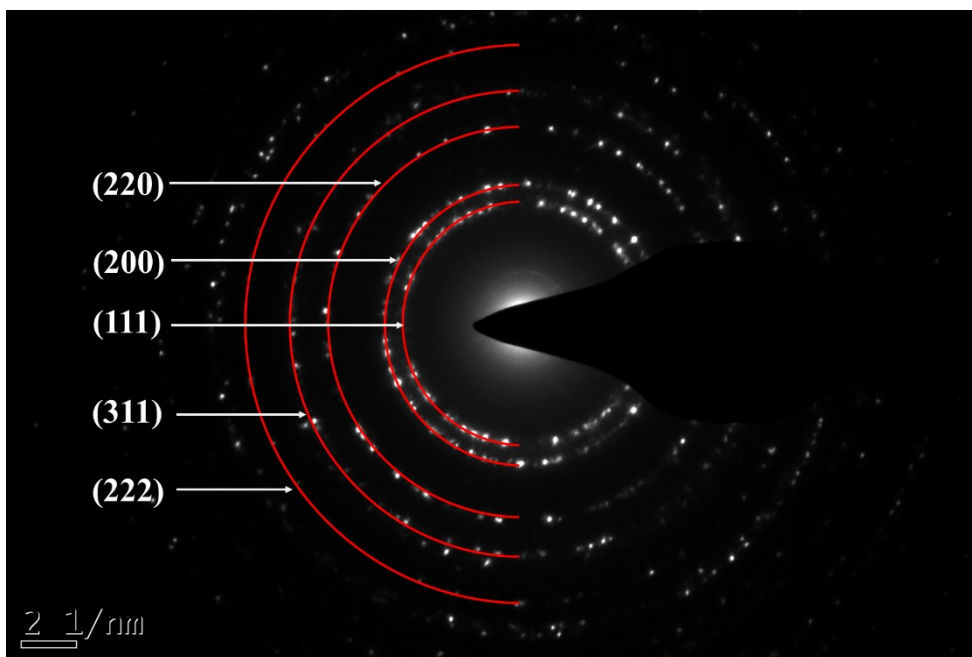

**Fig. S8** The selected area electron diffraction pattern of the Pt<sub>4</sub>Ni NCs.

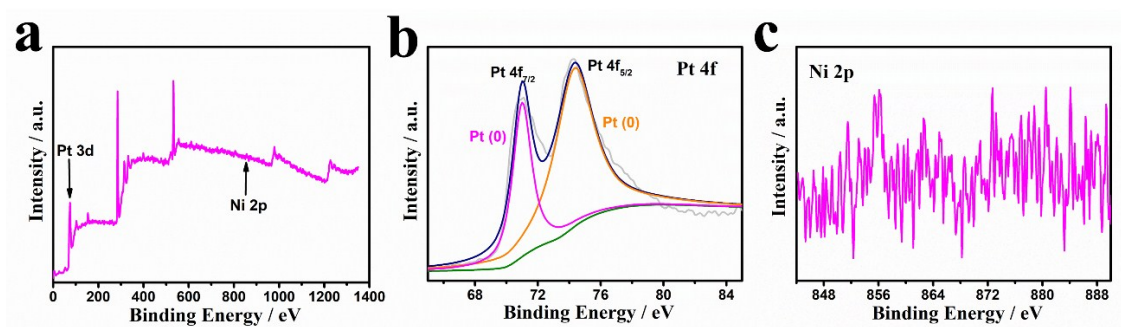

**Fig. S9** The XPS analysis of (a) survey spectrum, (b) Pt 4f, and (c) Ni 2p in the Pt<sub>4</sub>Ni NCs electrocatalysts.

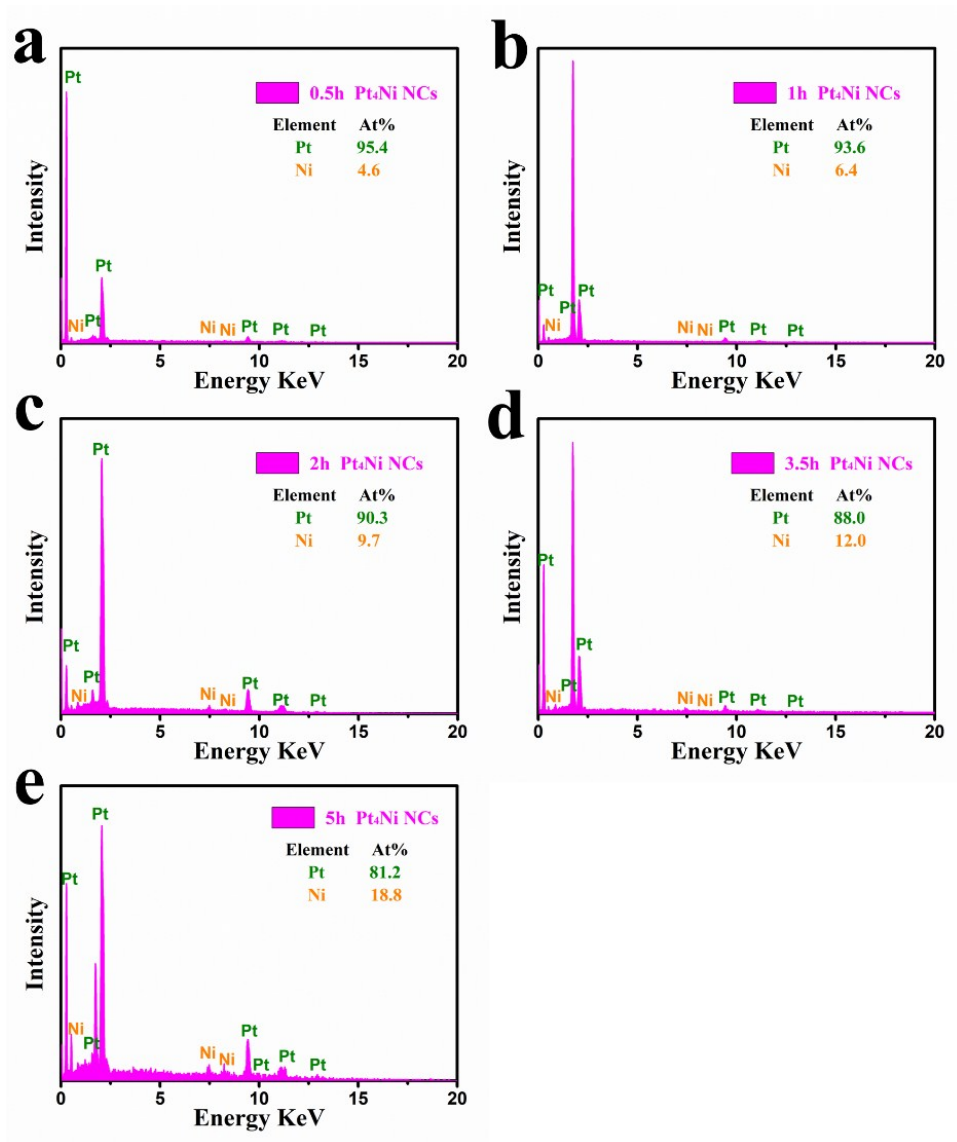

**Fig. S10** The EDS spectrum of Pt<sub>4</sub>Ni NCs intermediates obtained after the reaction have processed for (a) 30 min, (b) 1 h, (c) 2 h, (d) 3.5 h, and (e) 5h.

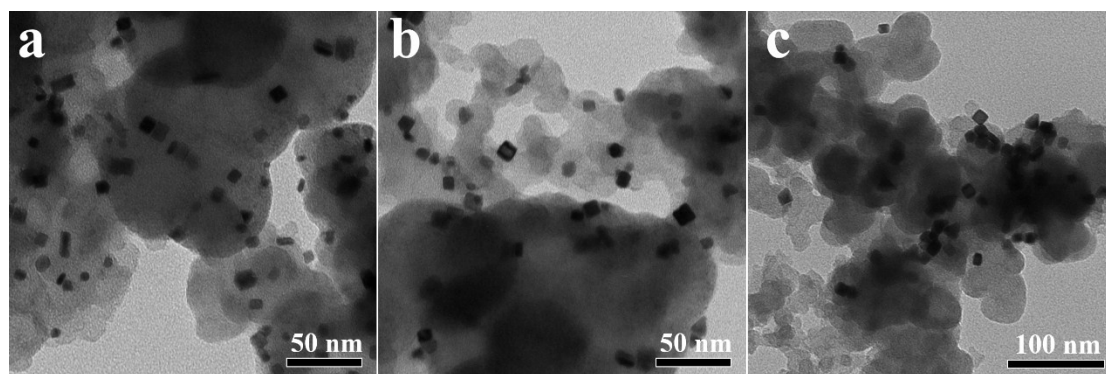

**Fig. S11** The TEM images of (a) Pt<sub>4</sub>Co NCs/C, (b) Pt<sub>4</sub>Fe NCs/C, and (c) Pt<sub>4</sub>Ni NCs/C.

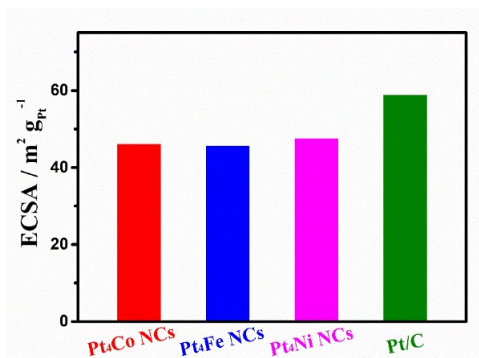

**Fig. S12** The histograms of ECSA values of the four different electrocatalysts.

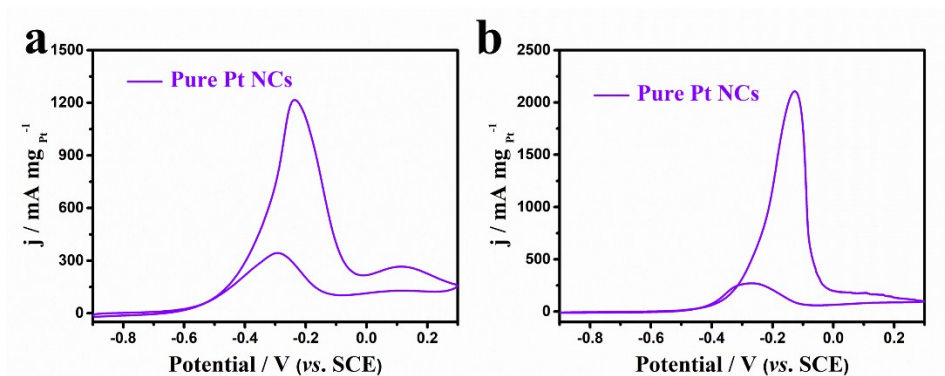

**Fig. S13** The CV curves of pure Pt NCS towards (a) GOR in 1 M KOH+1 M glycerol at  $0.05 \text{ V s}^{-1}$ , and (b) EGOR in 1 M KOH+1 M EG at  $0.05 \text{ V s}^{-1}$ .

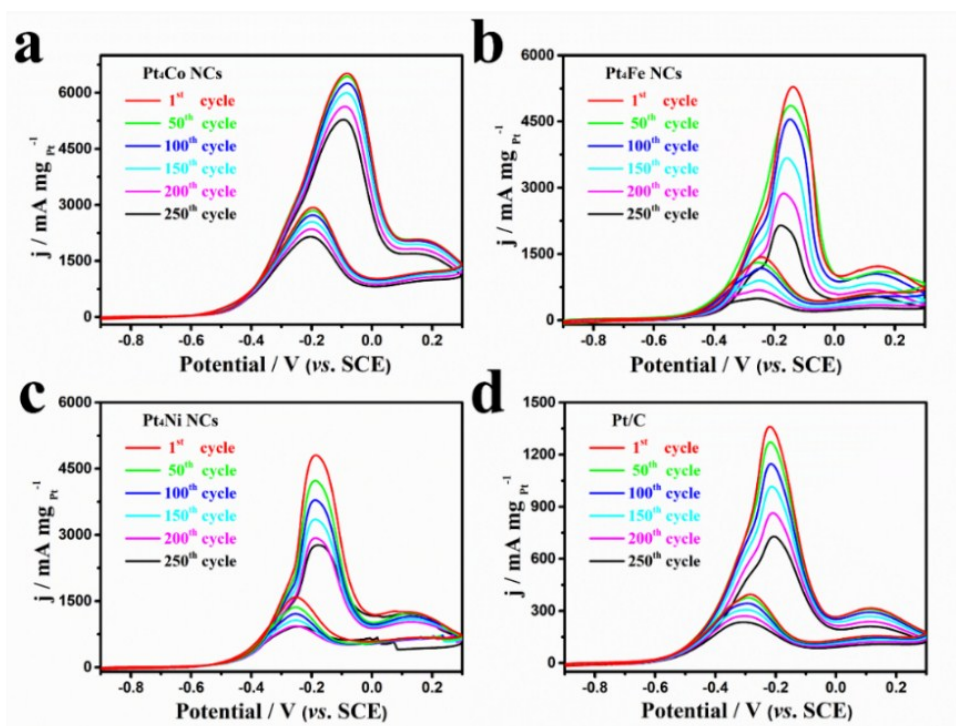

**Fig. S14** The CV curves of (a) Pt<sub>4</sub>Co NCS, (b) Pt<sub>4</sub>Fe NCS, (c) Pt<sub>4</sub>Ni NCS, and (d) commercial Pt/C catalysts towards GOR applying the successive CVs for 250 cycles.

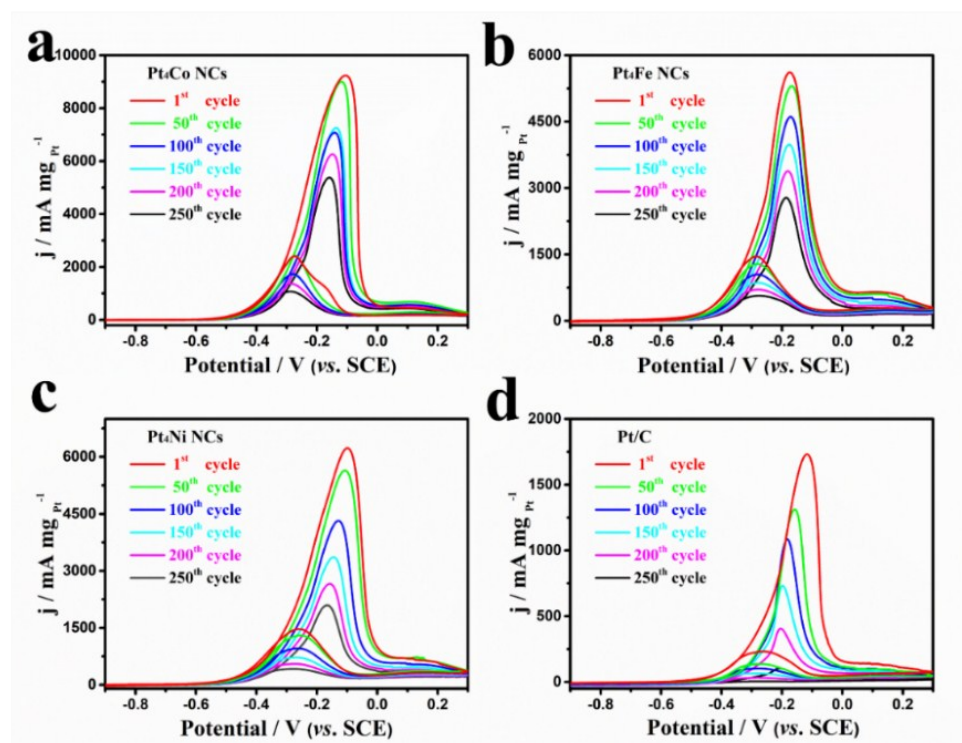

**Fig. S15** The CV curves of (a) Pt<sub>4</sub>Co NCs, (b) Pt<sub>4</sub>Fe NCs, (c) Pt<sub>4</sub>Ni NCs, and (d) commercial Pt/C catalysts towards EGOR applying the successive CVs for 250 cycles.

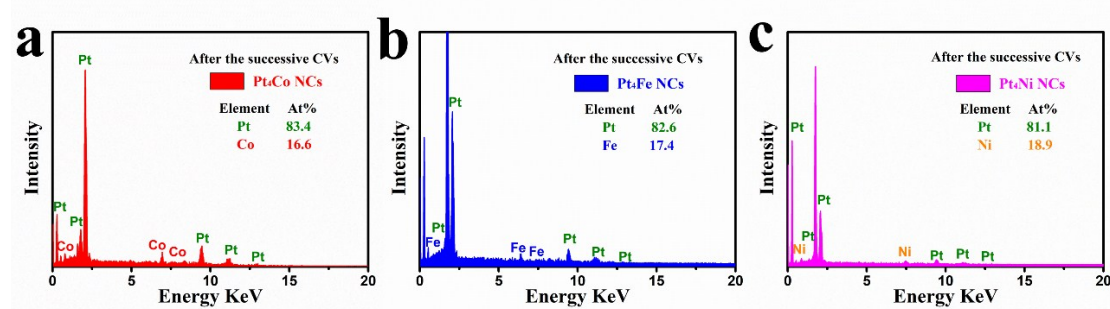

**Fig. S16** EDS spectrum of (a) Pt<sub>4</sub>Co NCs, (b) Pt<sub>4</sub>Fe NCs, and (c) Pt<sub>4</sub>Ni NCs catalysts after electrochemical durability test.

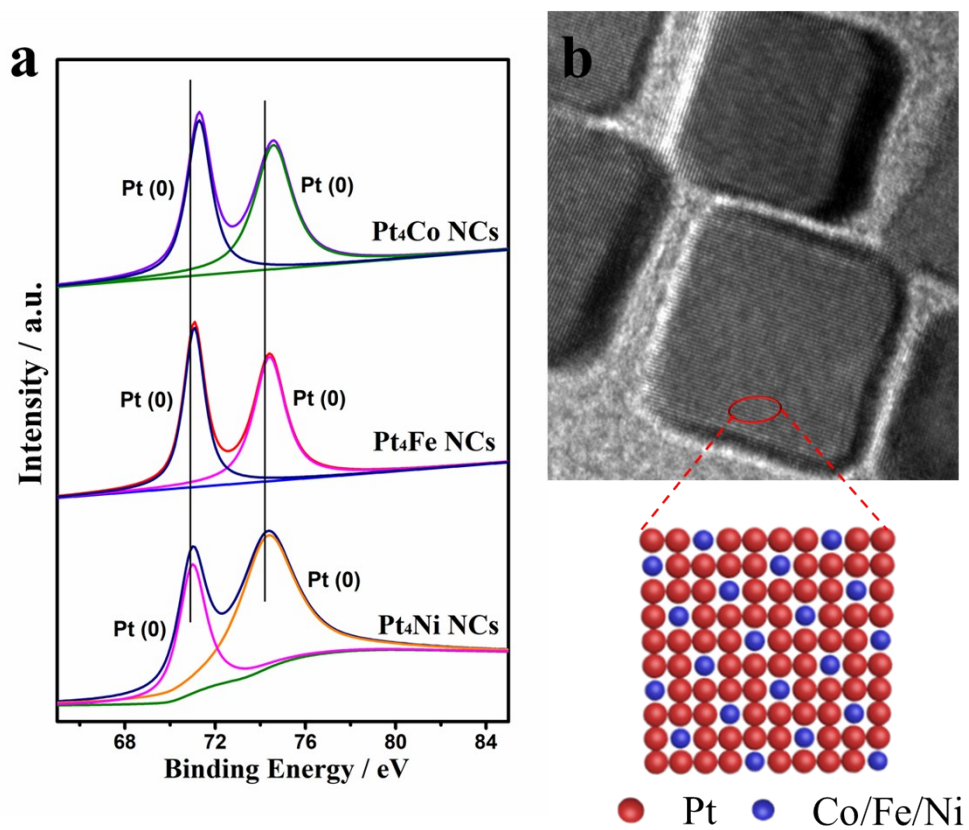

**Fig. S17** (a) XPS spectra of Pt 4f in Pt<sub>4</sub>M (Co, Fe, and Ni) NCs. (b) The schematic illustration of the improved electrocatalytic performance mechanisms of the Pt<sub>4</sub>M (Co, Fe, and Ni) NCs.

**Table S1** Other Pt-based electrocatalysts in different morphology for the glycerol electrochemical oxidation reaction in alkaline media.

| Catalysts                  | Morphology                     | Electrolyte                   | Mass activity<br>(mA mg <sup>-1</sup> ) | Reference                                              |
|----------------------------|--------------------------------|-------------------------------|-----------------------------------------|--------------------------------------------------------|
| Pt <sub>4</sub> Co<br>NCs  | Nano-cubes                     | 1 M KOH + 1 M<br>glycerol     | 6320.0                                  | <b>This work</b>                                       |
| Pt <sub>3</sub> Ni<br>SNWs | Sinuous Nano-<br>wires         | 1 M KOH + 1 M<br>glycerol     | 4250.3                                  | Nanoscale, 2019, <b>11</b> ,<br>4831-4836              |
| Pt <sub>89</sub> Co<br>NWs | Nano-wires                     | 1 M KOH + 1 M<br>glycerol     | 4573.0                                  | J. Colloid Interf. Sci.,<br>2019, <b>556</b> , 441-448 |
| PtCo<br>EDNC/C             | Deeply Excavated<br>Nano-cubes | 1 M KOH + 0.1<br>M glycerol   | ~1200                                   | Appl. Catal. B- Environ.,<br>2019, <b>258</b> , 117951 |
| PdPtCu<br>NSs              | Nano-sheets                    | 0.1 M KOH + 0.1<br>M glycerol | ~1400                                   | Green Chem., 2019,<br><b>21</b> , 2367-2374            |
| Pt <sub>3</sub> Ni NRs     | Nano-rods                      | 1 M KOH + 1 M<br>glycerol     | 4601.5                                  | J. Power Sources, 2019,<br><b>425</b> , 179-185        |
| Pt <sub>2</sub> Au<br>NWs  | Nano-wires                     | 1 M KOH + 0.1<br>M glycerol   | 3400                                    | J. Electroanal. Chem.,<br>2018, <b>811</b> , 37-45     |

**Table S2** Other Pt-based electrocatalysts in different morphology for the ethylene glycol electrochemical oxidation reaction in alkaline media.

| Catalysts                       | Morphology                        | Electrolyte           | Mass activity<br>(mA mg <sup>-1</sup> ) | Reference                                               |
|---------------------------------|-----------------------------------|-----------------------|-----------------------------------------|---------------------------------------------------------|
| Pt <sub>4</sub> Co NCs          | Nano-cubes                        | 1 M KOH +<br>1 M EG   | 9345.0                                  | <b>This work</b>                                        |
| Pt <sub>1</sub> Cu <sub>1</sub> | Nano-spheres                      | 1 M KOH +<br>1 M EG   | 2146.9                                  | J. Colloid Interf. Sci.,<br>2019, <b>551</b> , 81-88    |
| Pt-Co<br>EDNC/C                 | Deeply<br>Excavated<br>Nano-cubes | 1 M KOH +<br>0.1 M EG | ~2500                                   | Appl. Catal., B: Environ.,<br>2019, <b>258</b> , 117951 |
| PtRu alloy                      | Nano-crystal                      | 1 M KOH +<br>1 M EG   | 3052                                    | Int. J. Hydrogen Energy,<br>2017, 42, 20720-20728       |
